# Supplementary material for: Time-Restricted Eating and Bone Health: A Systematic Review with Meta-Analysis
Source: MDPI journal article supplement (doi:10.3390/nu16060876), 2024-03-18
Supplement: s1 [file s1]

# Time-restricted eating and bone health: A systematic review with meta-analysis

Rubén Fernández-Rodríguez <sup>1</sup>, Miriam Garrido-Miguel <sup>1,2</sup>, Bruno Bizzozero-Peroni <sup>1,3\*</sup>,  
Valentina Díaz-Goñi<sup>1</sup>, Eva Rodríguez-Gutiérrez <sup>1</sup>, María José Guzmán-Pavón <sup>4</sup>, Ana Belén  
Meseguer-Henarejos <sup>5</sup>, Ana Torres-Costoso<sup>1,4</sup>

1. Health and Social Research Center, Universidad de Castilla-La Mancha, 16002 Cuenca, Spain; Ru-ben.Fernandez@uclm.es

2. Research Network on Chronicity, Primary Care and Health Promotion (RICAPPS), Cuenca, Spain.

3. Faculty of Nursing, Universidad de Castilla-La Mancha, 02006, Albacete, Spain.

4. Instituto Superior de Educación Física, Universidad de la República, 40000, Rivera, Uruguay.

5. Faculty of Physiotherapy and Nursing, Universidad de Castilla-La Mancha, 45071, Toledo, Spain.

6. Faculty of Medicine, Department of Physiotherapy, Universidad de Murcia, 30120, Spain.

\*Correspondence: Bruno.Bizzozero@uclm.es; Tel.: +34-969179100

**Funding:** RFR is supported by a grant from the Spanish Ministry of Education, Culture and Sport (FPU 19/00167). BBP is supported by a grant from the University of Castilla-La Mancha co-financed by the European Social Fund (2020-PREDUCLM-16746). ERG is supported by a grant from the University of Castilla-La Mancha (2022-UNIVERS-11373). VDG is supported by a grant from the National Agency for Research and Innovation of Uruguay (grant number POS\_EXT\_2023\_1\_175630)

## *Index.*

| <b>ID</b>        | <b>SUBHEADING</b>                                                                                                                    |      |
|------------------|--------------------------------------------------------------------------------------------------------------------------------------|------|
| <b>PRISMA</b>    | Prisma checklist.                                                                                                                    | 3-5  |
| <b>TABLE S1</b>  | Search strategy for each database.                                                                                                   | 6    |
| <b>TABLE S2</b>  | Studies excluded after full-text reading with reasons.                                                                               | 7-15 |
| <b>TABLE S3</b>  | Effects of time-restricted eating interventions on bone mineral content compared to control conditions.                              | 16   |
| <b>TABLE S4</b>  | Effects of time-restricted eating interventions on bone turnover markers compared to control conditions.                             | 17   |
| <b>TABLE S5</b>  | Effects of time-restricted eating interventions on bone mineral density compared to control conditions.                              | 18   |
| <b>TABLE S6</b>  | Effects of time-restricted eating interventions on fat mass compared to control conditions.                                          | 19   |
| <b>TABLE S7</b>  | Effects of time-restricted eating interventions on lean mass compared to control conditions.                                         | 20   |
| <b>TABLE S8</b>  | Sensitivity analyses using the leave-one-out method.                                                                                 | 21   |
| <b>TABLE S9</b>  | Sensitivity analysis after maintaining the predominant health status and time-restricted eating protocol among the included studies. | 22   |
| <b>TABLE S10</b> | GRADE assessment.                                                                                                                    | 23   |
|                  |                                                                                                                                      |      |
| <b>FIGURE S1</b> | Risk of bias assessment                                                                                                              | 24   |

| Section and Topic             | Item # | Checklist item                                                                                                                                                                                                                                                                                       | Location where item is reported |
|-------------------------------|--------|------------------------------------------------------------------------------------------------------------------------------------------------------------------------------------------------------------------------------------------------------------------------------------------------------|---------------------------------|
| <b>TITLE</b>                  |        |                                                                                                                                                                                                                                                                                                      |                                 |
| Title                         | 1      | Identify the report as a systematic review.                                                                                                                                                                                                                                                          | Page 1                          |
| <b>ABSTRACT</b>               |        |                                                                                                                                                                                                                                                                                                      |                                 |
| Abstract                      | 2      | See the PRISMA 2020 for Abstracts checklist.                                                                                                                                                                                                                                                         | 1                               |
| <b>INTRODUCTION</b>           |        |                                                                                                                                                                                                                                                                                                      |                                 |
| Rationale                     | 3      | Describe the rationale for the review in the context of existing knowledge.                                                                                                                                                                                                                          | 1-2                             |
| Objectives                    | 4      | Provide an explicit statement of the objective(s) or question(s) the review addresses.                                                                                                                                                                                                               | 2                               |
| <b>METHODS</b>                |        |                                                                                                                                                                                                                                                                                                      |                                 |
| Eligibility criteria          | 5      | Specify the inclusion and exclusion criteria for the review and how studies were grouped for the syntheses.                                                                                                                                                                                          | 3                               |
| Information sources           | 6      | Specify all databases, registers, websites, organisations, reference lists and other sources searched or consulted to identify studies. Specify the date when each source was last searched or consulted.                                                                                            | 2                               |
| Search strategy               | 7      | Present the full search strategies for all databases, registers and websites, including any filters and limits used.                                                                                                                                                                                 | 3<br>Table S1                   |
| Selection process             | 8      | Specify the methods used to decide whether a study met the inclusion criteria of the review, including how many reviewers screened each record and each report retrieved, whether they worked independently, and if applicable, details of automation tools used in the process.                     | 3                               |
| Data collection process       | 9      | Specify the methods used to collect data from reports, including how many reviewers collected data from each report, whether they worked independently, any processes for obtaining or confirming data from study investigators, and if applicable, details of automation tools used in the process. | 3                               |
| Data items                    | 10a    | List and define all outcomes for which data were sought. Specify whether all results that were compatible with each outcome domain in each study were sought (e.g. for all measures, time points, analyses), and if not, the methods used to decide which results to collect.                        | 3                               |
|                               | 10b    | List and define all other variables for which data were sought (e.g. participant and intervention characteristics, funding sources). Describe any assumptions made about any missing or unclear information.                                                                                         | 3                               |
| Study risk of bias assessment | 11     | Specify the methods used to assess risk of bias in the included studies, including details of the tool(s) used, how many reviewers assessed each study and whether they worked independently, and if applicable, details of automation tools used in the process.                                    | 3                               |
| Effect measures               | 12     | Specify for each outcome the effect measure(s) (e.g. risk ratio, mean difference) used in the synthesis or presentation of results.                                                                                                                                                                  | 3-4                             |
| Synthesis methods             | 13a    | Describe the processes used to decide which studies were eligible for each synthesis (e.g. tabulating the study intervention characteristics and comparing against the planned groups for each synthesis (item #5)).                                                                                 | 4                               |
|                               | 13b    | Describe any methods required to prepare the data for presentation or synthesis, such as handling of missing summary statistics, or data conversions.                                                                                                                                                | 4                               |

| Section and Topic             | Item # | Checklist item                                                                                                                                                                                                                                                                       | Location where item is reported |
|-------------------------------|--------|--------------------------------------------------------------------------------------------------------------------------------------------------------------------------------------------------------------------------------------------------------------------------------------|---------------------------------|
|                               | 13c    | Describe any methods used to tabulate or visually display results of individual studies and syntheses.                                                                                                                                                                               | 4                               |
|                               | 13d    | Describe any methods used to synthesize results and provide a rationale for the choice(s). If meta-analysis was performed, describe the model(s), method(s) to identify the presence and extent of statistical heterogeneity, and software package(s) used.                          | 3-4                             |
|                               | 13e    | Describe any methods used to explore possible causes of heterogeneity among study results (e.g. subgroup analysis, meta-regression).                                                                                                                                                 | 3                               |
|                               | 13f    | Describe any sensitivity analyses conducted to assess robustness of the synthesized results.                                                                                                                                                                                         | 4                               |
| Reporting bias assessment     | 14     | Describe any methods used to assess risk of bias due to missing results in a synthesis (arising from reporting biases).                                                                                                                                                              | 4                               |
| Certainty assessment          | 15     | Describe any methods used to assess certainty (or confidence) in the body of evidence for an outcome.                                                                                                                                                                                | 4                               |
| <b>RESULTS</b>                |        |                                                                                                                                                                                                                                                                                      |                                 |
| Study selection               | 16a    | Describe the results of the search and selection process, from the number of records identified in the search to the number of studies included in the review, ideally using a flow diagram.                                                                                         | 4-5<br>Figure 1                 |
|                               | 16b    | Cite studies that might appear to meet the inclusion criteria, but which were excluded, and explain why they were excluded.                                                                                                                                                          | 4<br>Table S2                   |
| Study characteristics         | 17     | Cite each included study and present its characteristics.                                                                                                                                                                                                                            | 5<br>Table 1                    |
| Risk of bias in studies       | 18     | Present assessments of risk of bias for each included study.                                                                                                                                                                                                                         | 10<br>Figure S1                 |
| Results of individual studies | 19     | For all outcomes, present, for each study: (a) summary statistics for each group (where appropriate) and (b) an effect estimate and its precision (e.g. confidence/credible interval), ideally using structured tables or plots.                                                     | 9<br>Figures S3-S7              |
| Results of syntheses          | 20a    | For each synthesis, briefly summarise the characteristics and risk of bias among contributing studies.                                                                                                                                                                               | NA                              |
|                               | 20b    | Present results of all statistical syntheses conducted. If meta-analysis was done, present for each the summary estimate and its precision (e.g. confidence/credible interval) and measures of statistical heterogeneity. If comparing groups, describe the direction of the effect. | 10<br>Figure 2                  |
|                               | 20c    | Present results of all investigations of possible causes of heterogeneity among study results.                                                                                                                                                                                       | NA                              |
|                               | 20d    | Present results of all sensitivity analyses conducted to assess the robustness of the synthesized results.                                                                                                                                                                           | 10<br>Table S8                  |
| Reporting biases              | 21     | Present assessments of risk of bias due to missing results (arising from reporting biases) for each synthesis assessed.                                                                                                                                                              | NA                              |

| Section and Topic                              | Item # | Checklist item                                                                                                                                                                                                                             | Location where item is reported |
|------------------------------------------------|--------|--------------------------------------------------------------------------------------------------------------------------------------------------------------------------------------------------------------------------------------------|---------------------------------|
| Certainty of evidence                          | 22     | Present assessments of certainty (or confidence) in the body of evidence for each outcome assessed.                                                                                                                                        | 10<br>Table S10                 |
| <b>DISCUSSION</b>                              |        |                                                                                                                                                                                                                                            |                                 |
| Discussion                                     | 23a    | Provide a general interpretation of the results in the context of other evidence.                                                                                                                                                          | 10-11                           |
|                                                | 23b    | Discuss any limitations of the evidence included in the review.                                                                                                                                                                            | 11                              |
|                                                | 23c    | Discuss any limitations of the review processes used.                                                                                                                                                                                      | 12                              |
|                                                | 23d    | Discuss implications of the results for practice, policy, and future research.                                                                                                                                                             | 12                              |
| <b>OTHER INFORMATION</b>                       |        |                                                                                                                                                                                                                                            |                                 |
| Registration and protocol                      | 24a    | Provide registration information for the review, including register name and registration number, or state that the review was not registered.                                                                                             | 2                               |
|                                                | 24b    | Indicate where the review protocol can be accessed, or state that a protocol was not prepared.                                                                                                                                             | NA                              |
|                                                | 24c    | Describe and explain any amendments to information provided at registration or in the protocol.                                                                                                                                            | NA                              |
| Support                                        | 25     | Describe sources of financial or non-financial support for the review, and the role of the funders or sponsors in the review.                                                                                                              | 12                              |
| Competing interests                            | 26     | Declare any competing interests of review authors.                                                                                                                                                                                         | 12                              |
| Availability of data, code and other materials | 27     | Report which of the following are publicly available and where they can be found: template data collection forms; data extracted from included studies; data used for all analyses; analytic code; any other materials used in the review. | 12                              |

**Table S1.** Search strategy for each database.

*Date:* October 1<sup>st</sup>, 2023.

**MEDLINE (via Pubmed):**

("time-restricted eating"[All Fields] OR "time-restricted feeding"[All Fields]) AND ("bone"[All Fields] OR "bone mineral density"[All Fields] OR ("osteoporosis"[MeSH Terms] OR "osteoporosis"[All Fields] OR "osteoporoses"[All Fields] OR "osteoporosis, postmenopausal"[MeSH Terms] OR ("osteoporosis"[All Fields] AND "postmenopausal"[All Fields]) OR "postmenopausal osteoporosis"[All Fields]) OR ("fractur"[All Fields] OR "fractural"[All Fields] OR "fracture s"[All Fields] OR "fractures, bone"[MeSH Terms] OR ("fractures"[All Fields] AND "bone"[All Fields]) OR "bone fractures"[All Fields] OR "fracture"[All Fields] OR "fractured"[All Fields] OR "fractures"[All Fields] OR "fracturing"[All Fields]) OR "bone turnover"[All Fields] OR "bone remodelling"[All Fields]). **Results**= 11

("Time-restricted eating" OR "time-restricted feeding" OR "time limited eating") NOT review. Filter: Human. **Results**= 237

**Cochrane:**

Title abs key: ("Time-restricted eating" OR "time-restricted feeding" OR "time limited eating") AND ("bone" OR "bone turnover" OR "bone mineral density" OR "osteoporosis"). **Results:** 15

**Scopus:**

Title abs key: ("Time-restricted eating" OR "time-restricted feeding" OR "time limited eating") AND ("bone" OR "bone turnover" OR "bone mineral density" OR "osteoporosis"). **Results:** 16 (limited to article)\*

**WoS:**

Topic: ("Time-restricted eating" OR "time-restricted feeding" OR "time limited eating") AND ("bone" OR "bone turnover" OR "bone mineral density" OR "osteoporosis"). **Results:** 9 (limited to article)

**TOTAL RESULTS:** 51+237=288

**After duplicated removed with Endnote tool:** 264 (removed = 24)

**Excluded after Title-abstract screening:** 196

**Assessed full text:** 68 (excluded 61)

**Finally included in the review:** 7

**Table S2.** Reason for exclusion after full-text screening (n= 61).

| ID | Reference                                                                                                                                                                                                                                                                                                                                                                                                                                                                                                                               | Reason for exclusion    |
|----|-----------------------------------------------------------------------------------------------------------------------------------------------------------------------------------------------------------------------------------------------------------------------------------------------------------------------------------------------------------------------------------------------------------------------------------------------------------------------------------------------------------------------------------------|-------------------------|
| 1  | Allison, K. C., Hopkins, C. M., Ruggieri, M., Spaeth, A. M., Ahima, R. S., Zhang, Z., Taylor, D. M., & Goel, N. (2021). Prolonged, Controlled Daytime versus Delayed Eating Impacts Weight and Metabolism. <i>Curr Biol</i> , 31(3), 650-657.e653. <a href="https://doi.org/10.1016/j.cub.2020.10.092">https://doi.org/10.1016/j.cub.2020.10.092</a>                                                                                                                                                                                    | Non-outcome of interest |
| 2  | Andriessen, C., Fealy, C. E., Veelen, A., van Beek, S. M. M., Roumans, K. H. M., Connell, N. J., Mevenkamp, J., Moonen-Kornips, E., Havekes, B., Schrauwen-Hinderling, V. B., Hoeks, J., & Schrauwen, P. (2022). Three weeks of time-restricted eating improves glucose homeostasis in adults with type 2 diabetes but does not improve insulin sensitivity: a randomised crossover trial. <i>Diabetologia</i> , 65(10), 1710-1720. <a href="https://doi.org/10.1007/s00125-022-05752-z">https://doi.org/10.1007/s00125-022-05752-z</a> | Non-outcome of interest |
| 3  | Bantle, A. E., Lau, K. J., Wang, Q., Malaeb, S., Harindhanavudhi, T., Manoogian, E. N. C., Panda, S., Mashek, D. G., & Chow, L. S. (2023). Time-restricted eating did not alter insulin sensitivity or $\beta$ -cell function in adults with obesity: A randomized pilot study. <i>Obesity (Silver Spring)</i> , 31 Suppl 1(Suppl 1), 108-115. <a href="https://doi.org/10.1002/oby.23620">https://doi.org/10.1002/oby.23620</a>                                                                                                        | Non-outcome of interest |
| 4  | Bao, R., Sun, Y., Jiang, Y., Ye, L., Hong, J., & Wang, W. (2022). Effects of Time-Restricted Feeding on Energy Balance: A Cross-Over Trial in Healthy Subjects. <i>Front Endocrinol (Lausanne)</i> , 13, 870054. <a href="https://doi.org/10.3389/fendo.2022.870054">https://doi.org/10.3389/fendo.2022.870054</a>                                                                                                                                                                                                                      | Non-outcome of interest |
| 5  | Brady, A. J., Langton, H. M., Mulligan, M., & Egan, B. (2021). Effects of 8 wk of 16:8 Time-restricted Eating in Male Middle- and Long-Distance Runners. <i>Med Sci Sports Exerc</i> , 53(3), 633-642. <a href="https://doi.org/10.1249/mss.0000000000002488">https://doi.org/10.1249/mss.0000000000002488</a>                                                                                                                                                                                                                          | Non-outcome of interest |
| 6  | Chow, L. S., Manoogian, E. N. C., Alvear, A., Fleischer, J. G., Thor, H., Dietsche, K., Wang, Q., Hodges, J. S., Esch, N., Malaeb, S., Harindhanavudhi, T., Nair, K. S., Panda, S., & Mashek, D. G. (2020). Time-Restricted Eating Effects on Body Composition and Metabolic Measures in Humans who are Overweight: A Feasibility Study. <i>Obesity (Silver Spring)</i> , 28(5), 860-869. <a href="https://doi.org/10.1002/oby.22756">https://doi.org/10.1002/oby.22756</a>                                                             | Non-outcome of interest |
| 7  | Cienfuegos, S., Gabel, K., Kalam, F., Ezpeleta, M., Lin, S., & Varady, K. A. (2021). Changes in body weight and metabolic risk during time restricted                                                                                                                                                                                                                                                                                                                                                                                   | Non-outcome of interest |

|    |                                                                                                                                                                                                                                                                                                                                                                                                                          |                         |
|----|--------------------------------------------------------------------------------------------------------------------------------------------------------------------------------------------------------------------------------------------------------------------------------------------------------------------------------------------------------------------------------------------------------------------------|-------------------------|
|    | feeding in premenopausal versus postmenopausal women. <i>Exp Gerontol</i> , 154, 111545. <a href="https://doi.org/10.1016/j.exger.2021.111545">https://doi.org/10.1016/j.exger.2021.111545</a>                                                                                                                                                                                                                           |                         |
| 8  | Cienfuegos, S., Gabel, K., Kalam, F., Ezpeleta, M., Pavlou, V., Lin, S., Wiseman, E., & Varady, K. A. (2022). The effect of 4-h versus 6-h time restricted feeding on sleep quality, duration, insomnia severity and obstructive sleep apnea in adults with obesity. <i>Nutr Health</i> , 28(1), 5-11. <a href="https://doi.org/10.1177/02601060211002347">https://doi.org/10.1177/02601060211002347</a>                 | Non-outcome of interest |
| 9  | Cienfuegos, S., Gabel, K., Kalam, F., Ezpeleta, M., Wiseman, E., Pavlou, V., Lin, S., Oliveira, M. L., & Varady, K. A. (2020). Effects of 4- and 6-h Time-Restricted Feeding on Weight and Cardiometabolic Health: A Randomized Controlled Trial in Adults with Obesity. <i>Cell Metab</i> , 32(3), 366-378.e363. <a href="https://doi.org/10.1016/j.cmet.2020.06.018">https://doi.org/10.1016/j.cmet.2020.06.018</a>    | Non-outcome of interest |
| 10 | Correia, J. M., Santos, I., Pezarat-Correia, P., Minderico, C., Schoenfeld, B. J., & Mendonca, G. V. (2021). Effects of Time-Restricted Feeding on Supramaximal Exercise Performance and Body Composition: A Randomized and Counterbalanced Crossover Study in Healthy Men. <i>Int J Environ Res Public Health</i> , 18(14). <a href="https://doi.org/10.3390/ijerph18147227">https://doi.org/10.3390/ijerph18147227</a> | Non-outcome of interest |
| 11 | Correia, J. M., Santos, P. D. G., Pezarat-Correia, P., Minderico, C. S., Infante, J., & Mendonca, G. V. (2023). Effect of Time-Restricted Eating and Resistance Training on High-Speed Strength and Body Composition. <i>Nutrients</i> , 15(2). <a href="https://doi.org/10.3390/nu15020285">https://doi.org/10.3390/nu15020285</a>                                                                                      | Non-outcome of interest |
| 12 | Cröse, A., Alvear, A., Singroy, S., Wang, Q., Manoogian, E., Panda, S., Mashek, D. G., & Chow, L. S. (2021). Time-Restricted Eating Improves Quality of Life Measures in Overweight Humans. <i>Nutrients</i> , 13(5). <a href="https://doi.org/10.3390/nu13051430">https://doi.org/10.3390/nu13051430</a>                                                                                                                | Non-outcome of interest |
| 13 | Da Silva, B. R., Kirkham, A. A., Ford, K. L., Haykowsky, M. J., Paterson, D. I., Joy, A. A., Pituskin, E., Thompson, R., & Prado, C. M. (2023). Time-Restricted Eating in Breast Cancer Survivors: Effects on Body Composition and Nutritional Status. <i>Nutr Cancer</i> , 75(5), 1309-1314. <a href="https://doi.org/10.1080/01635581.2023.2195543">https://doi.org/10.1080/01635581.2023.2195543</a>                  | Study design            |
| 14 | de Oliveira Maranhão Pureza, I. R., da Silva Junior, A. E., Silva Praxedes, D. R., Lessa Vasconcelos, L. G., de Lima Macena, M., Vieira de Melo, I. S., de Menezes Toledo Florêncio, T. M., & Bueno, N. B. (2021). Effects of time-restricted feeding on body weight, body composition and vital signs in low-                                                                                                           | Non-outcome of interest |



|    |                                                                                                                                                                                                                                                                                                                                                                                                                             |                         |
|----|-----------------------------------------------------------------------------------------------------------------------------------------------------------------------------------------------------------------------------------------------------------------------------------------------------------------------------------------------------------------------------------------------------------------------------|-------------------------|
|    | income women with obesity: A 12-month randomized clinical trial. Clin Nutr, 40(3), 759-766. <a href="https://doi.org/10.1016/j.clnu.2020.06.036">https://doi.org/10.1016/j.clnu.2020.06.036</a>                                                                                                                                                                                                                             |                         |
| 15 | Domaszewski, P., Konieczny, M., Dybek, T., Łukaniszyn-Domaszewska, K., Anton, S., Sadowska-Krępa, E., & Skorupska, E. (2023). Comparison of the effects of six-week time-restricted eating on weight loss, body composition, and visceral fat in overweight older men and women. Exp Gerontol, 174, 112116. <a href="https://doi.org/10.1016/j.exger.2023.112116">https://doi.org/10.1016/j.exger.2023.112116</a>           | Non-outcome of interest |
| 16 | Domaszewski, P., Konieczny, M., Pakosz, P., Łukaniszyn-Domaszewska, K., Mikuláková, W., Sadowska-Krępa, E., & Anton, S. (2022). Effect of a six-week times restricted eating intervention on the body composition in early elderly men with overweight. Sci Rep, 12(1), 9816. <a href="https://doi.org/10.1038/s41598-022-13904-9">https://doi.org/10.1038/s41598-022-13904-9</a>                                           | Non-outcome of interest |
| 17 | Ferrocino, I., Pellegrini, M., D'Eusebio, C., Goitre, I., Ponzio, V., Fadda, M., Rosato, R., Mengozzi, G., Beccuti, G., Merlo, F. D., Rahimi, F., Comazzi, I., Cocolin, L., Ghigo, E., & Bo, S. (2022). The Effects of Time-Restricted Eating on Metabolism and Gut Microbiota: A Real-Life Study. Nutrients, 14(13). <a href="https://doi.org/10.3390/nu14132569">https://doi.org/10.3390/nu14132569</a>                   | Study design            |
| 18 | Gasmi, M., Sellami, M., Denham, J., Padulo, J., Kuvacic, G., Selmi, W., & Khalifa, R. (2018). Time-restricted feeding influences immune responses without compromising muscle performance in older men. Nutrition, 51-52, 29-37. <a href="https://doi.org/10.1016/j.nut.2017.12.014">https://doi.org/10.1016/j.nut.2017.12.014</a>                                                                                          | Non-outcome of interest |
| 19 | Gonzalez, A. E., Waldman, H. S., Abel, M. G., McCurdy, K. W., & McAllister, M. J. (2021). Impact of Time Restricted Feeding on Fitness Variables in Professional Resistance Trained Firefighters. J Occup Environ Med, 63(4), 343-349. <a href="https://doi.org/10.1097/jom.0000000000002144">https://doi.org/10.1097/jom.0000000000002144</a>                                                                              | Study design            |
| 20 | Haganes, K. L., Silva, C. P., Eyjólfssdóttir, S. K., Steen, S., Grindberg, M., Lydersen, S., Hawley, J. A., & Moholdt, T. (2022). Time-restricted eating and exercise training improve HbA1c and body composition in women with overweight/obesity: A randomized controlled trial. Cell Metab, 34(10), 1457-1471.e1454. <a href="https://doi.org/10.1016/j.cmet.2022.09.003">https://doi.org/10.1016/j.cmet.2022.09.003</a> | Non-outcome of interest |
| 21 | He, M., Wang, J., Liang, Q., Li, M., Guo, H., Wang, Y., Deji, C., Sui, J., Wang, Y. W., Liu, Y., Zheng, Y., Qian, B., Chen, H., Ma, M., Su, S., Geng, H., Zhou, W. X., Guo, X., Zhu, W. Z., . . . Shi, B. (2022). Time-restricted eating with or without low-carbohydrate diet reduces visceral fat and improves metabolic                                                                                                  | Non-outcome of interest |

|    |                                                                                                                                                                                                                                                                                                                                                                                                                                                                   |                         |
|----|-------------------------------------------------------------------------------------------------------------------------------------------------------------------------------------------------------------------------------------------------------------------------------------------------------------------------------------------------------------------------------------------------------------------------------------------------------------------|-------------------------|
|    | syndrome: A randomized trial. <i>Cell Rep Med</i> , 3(10), 100777. <a href="https://doi.org/10.1016/j.xcrm.2022.100777">https://doi.org/10.1016/j.xcrm.2022.100777</a>                                                                                                                                                                                                                                                                                            |                         |
| 22 | Hutchison, A. T., Regmi, P., Manoogian, E. N. C., Fleischer, J. G., Wittert, G. A., Panda, S., & Heilbronn, L. K. (2019). Time-Restricted Feeding Improves Glucose Tolerance in Men at Risk for Type 2 Diabetes: A Randomized Crossover Trial. <i>Obesity (Silver Spring)</i> , 27(5), 724-732. <a href="https://doi.org/10.1002/oby.22449">https://doi.org/10.1002/oby.22449</a>                                                                                 | Study design            |
| 23 | Isenmann, E., Dissemond, J., & Geisler, S. (2021). The Effects of a Macronutrient-Based Diet and Time-Restricted Feeding (16:8) on Body Composition in Physically Active Individuals-A 14-Week Randomised Controlled Trial. <i>Nutrients</i> , 13(9). <a href="https://doi.org/10.3390/nu13093122">https://doi.org/10.3390/nu13093122</a>                                                                                                                         | Non-outcome of interest |
| 24 | Jamshed, H., Steger, F. L., Bryan, D. R., Richman, J. S., Warriner, A. H., Hanick, C. J., Martin, C. K., Salvy, S. J., & Peterson, C. M. (2022). Effectiveness of Early Time-Restricted Eating for Weight Loss, Fat Loss, and Cardiometabolic Health in Adults With Obesity: A Randomized Clinical Trial. <i>JAMA Intern Med</i> , 182(9), 953-962. <a href="https://doi.org/10.1001/jamainternmed.2022.3050">https://doi.org/10.1001/jamainternmed.2022.3050</a> | Non-outcome of interest |
| 25 | Keszytüs, D., Cermak, P., Gulich, M., & Keszytüs, T. (2019). Adherence to Time-Restricted Feeding and Impact on Abdominal Obesity in Primary Care Patients: Results of a Pilot Study in a Pre-Post Design. <i>Nutrients</i> , 11(12). <a href="https://doi.org/10.3390/nu11122854">https://doi.org/10.3390/nu11122854</a>                                                                                                                                         | Study design            |
| 26 | Li, C., Xing, C., Zhang, J., Zhao, H., Shi, W., & He, B. (2021). Eight-hour time-restricted feeding improves endocrine and metabolic profiles in women with anovulatory polycystic ovary syndrome. <i>J Transl Med</i> , 19(1), 148. <a href="https://doi.org/10.1186/s12967-021-02817-2">https://doi.org/10.1186/s12967-021-02817-2</a>                                                                                                                          | Study design            |
| 27 | Lin, S., Cienfuegos, S., Ezpeleta, M., Gabel, K., Pavlou, V., Mulas, A., Chakos, K., McStay, M., Wu, J., Tussing-Humphreys, L., Alexandria, S. J., Sanchez, J., Unterman, T., & Varady, K. A. (2023). Time-Restricted Eating Without Calorie Counting for Weight Loss in a Racially Diverse Population : A Randomized Controlled Trial. <i>Ann Intern Med</i> , 176(7), 885-895. <a href="https://doi.org/10.7326/m23-0052">https://doi.org/10.7326/m23-0052</a>  | Non-outcome of interest |
| 28 | Lin, Y. J., Wang, Y. T., Chan, L. C., & Chu, N. F. (2022). Effect of time-restricted feeding on body composition and cardio-metabolic risk in middle-aged women in Taiwan. <i>Nutrition</i> , 93, 111504. <a href="https://doi.org/10.1016/j.nut.2021.111504">https://doi.org/10.1016/j.nut.2021.111504</a>                                                                                                                                                       | Non-outcome of interest |

|    |                                                                                                                                                                                                                                                                                                                                                                                                                                                                                                                         |                         |
|----|-------------------------------------------------------------------------------------------------------------------------------------------------------------------------------------------------------------------------------------------------------------------------------------------------------------------------------------------------------------------------------------------------------------------------------------------------------------------------------------------------------------------------|-------------------------|
| 29 | Liu, D., Huang, Y., Huang, C., Yang, S., Wei, X., Zhang, P., Guo, D., Lin, J., Xu, B., Li, C., He, H., He, J., Liu, S., Shi, L., Xue, Y., & Zhang, H. (2022). Calorie Restriction with or without Time-Restricted Eating in Weight Loss. <i>N Engl J Med</i> , 386(16), 1495-1504. <a href="https://doi.org/10.1056/NEJMoa2114833">https://doi.org/10.1056/NEJMoa2114833</a>                                                                                                                                            | Non-outcome of interest |
| 30 | Liu, H. T., Chen, S. Y., Ji, H. Y., & Dai, Z. Q. (2023). Effects of time-restricted feeding and walking exercise on the physical health of female college students with hidden obesity: a randomized trial. <i>Frontiers in Public Health</i> , 11, Article 1020887. <a href="https://doi.org/10.3389/fpubh.2023.1020887">https://doi.org/10.3389/fpubh.2023.1020887</a>                                                                                                                                                | Duplicated              |
| 31 | Lobene, A., Panda, S., Mashek, D., Gallant, K. H., & Chow, L. (2020). Time Restricted Eating for 12 Weeks Does Not Adversely Alter Bone Mineral Content and Bone Metabolism in Overweight Adults [Journal article; Conference proceeding]. <i>Journal of bone and mineral research</i> , 35(SUPPL 1), 232-233. <a href="https://doi.org/10.1002/jbmr.4206">https://doi.org/10.1002/jbmr.4206</a>                                                                                                                        | Duplicated              |
| 32 | Lobene, A. J., Panda, S., Mashek, D. G., Manoogian, E. N. C., Hill Gallant, K. M., & Chow, L. S. (2021). Time-Restricted Eating for 12 Weeks Does Not Adversely Alter Bone Turnover in Overweight Adults. <i>Nutrients</i> , 13(4). <a href="https://doi.org/10.3390/nu13041155">https://doi.org/10.3390/nu13041155</a>                                                                                                                                                                                                 | Duplicated              |
| 33 | Manoogian, E. N. C., Zadourian, A., Lo, H. C., Gutierrez, N. R., Shoghi, A., Rosander, A., Pazargadi, A., Ormiston, C. K., Wang, X., Sui, J., Hou, Z., Fleischer, J. G., Golshan, S., Taub, P. R., & Panda, S. (2022). Feasibility of time-restricted eating and impacts on cardiometabolic health in 24-h shift workers: The Healthy Heroes randomized control trial. <i>Cell Metab</i> , 34(10), 1442-1456.e1447. <a href="https://doi.org/10.1016/j.cmet.2022.08.018">https://doi.org/10.1016/j.cmet.2022.08.018</a> | Non-outcome of interest |
| 34 | Martens, C. R., Rossman, M. J., Mazzo, M. R., Jankowski, L. R., Nagy, E. E., Denman, B. A., Richey, J. J., Johnson, S. A., Ziemba, B. P., Wang, Y., Peterson, C. M., Chonchol, M., & Seals, D. R. (2020). Short-term time-restricted feeding is safe and feasible in non-obese healthy midlife and older adults. <i>Geroscience</i> , 42(2), 667-686. <a href="https://doi.org/10.1007/s11357-020-00156-6">https://doi.org/10.1007/s11357-020-00156-6</a>                                                               | Duplicated              |
| 35 | Mayra, S. T., Chondropoulos, K., De Leon, A., Kravat, N., & Johnston, C. S. (2022). The feasibility and preliminary efficacy of early time-restricted eating on diet quality in college students: A randomized study. <i>Obes Res Clin Pract</i> , 16(5), 413-420. <a href="https://doi.org/10.1016/j.orcp.2022.08.009">https://doi.org/10.1016/j.orcp.2022.08.009</a>                                                                                                                                                  | Non-outcome of interest |
| 36 | McAllister, M. J., Pigg, B. L., Renteria, L. I., & Waldman, H. S. (2020). Time-restricted feeding improves markers of cardiometabolic health in physically                                                                                                                                                                                                                                                                                                                                                              | Study design            |

|    |                                                                                                                                                                                                                                                                                                                                                                                                                                                                                                                                       |                         |
|----|---------------------------------------------------------------------------------------------------------------------------------------------------------------------------------------------------------------------------------------------------------------------------------------------------------------------------------------------------------------------------------------------------------------------------------------------------------------------------------------------------------------------------------------|-------------------------|
|    | active college-age men: a 4-week randomized pre-post pilot study. <i>Nutr Res</i> , 75, 32-43. <a href="https://doi.org/10.1016/j.nutres.2019.12.001">https://doi.org/10.1016/j.nutres.2019.12.001</a>                                                                                                                                                                                                                                                                                                                                |                         |
| 37 | Moro, T., Tinsley, G., Bianco, A., Marcolin, G., Pacelli, Q. F., Battaglia, G., Palma, A., Gentil, P., Neri, M., & Paoli, A. (2016). Effects of eight weeks of time-restricted feeding (16/8) on basal metabolism, maximal strength, body composition, inflammation, and cardiovascular risk factors in resistance-trained males. <i>J Transl Med</i> , 14(1), 290. <a href="https://doi.org/10.1186/s12967-016-1044-0">https://doi.org/10.1186/s12967-016-1044-0</a>                                                                 | Non-outcome of interest |
| 38 | Moro, T., Tinsley, G., Longo, G., Grigoletto, D., Bianco, A., Ferraris, C., Guglielmetti, M., Veneto, A., Tagliabue, A., Marcolin, G., & Paoli, A. (2020). Time-restricted eating effects on performance, immune function, and body composition in elite cyclists: a randomized controlled trial. <i>J Int Soc Sports Nutr</i> , 17(1), 65. <a href="https://doi.org/10.1186/s12970-020-00396-z">https://doi.org/10.1186/s12970-020-00396-z</a>                                                                                       | Non-outcome of interest |
| 39 | Moro, T., Tinsley, G., Pacelli, F. Q., Marcolin, G., Bianco, A., & Paoli, A. (2021). Twelve Months of Time-restricted Eating and Resistance Training Improves Inflammatory Markers and Cardiometabolic Risk Factors. <i>Med Sci Sports Exerc</i> , 53(12), 2577-2585. <a href="https://doi.org/10.1249/mss.0000000000002738">https://doi.org/10.1249/mss.0000000000002738</a>                                                                                                                                                         | Non-outcome of interest |
| 40 | Papageorgiou, M., Biver, E., Mareschal, J., Phillips, N. E., Hemmer, A., Biolley, E., Schwab, N., Manoogian, E. N. C., Gonzalez Rodriguez, E., Aeberli, D., & et al. (2023). The Effects Of Time-Restricted Eating (Tre) And Weight Loss On Bone Metabolism And Health: an Exploratory Analysis In A 6-Month Randomised Controlled Trial [Journal article; Conference proceeding]. <i>Clinical nutrition ESPEN</i> , 54, 558. <a href="https://doi.org/10.1016/j.clnesp.2022.09.296">https://doi.org/10.1016/j.clnesp.2022.09.296</a> | Duplicated              |
| 41 | Papageorgiou, M., Biver, E., Mareschal, J., Phillips, N. E., Hemmer, A., Biolley, E., Schwab, N., Manoogian, E. N. C., Gonzalez Rodriguez, E., Aeberli, D., & et al. (2023). The effects of time-restricted eating and weight loss on bone metabolism and health: a 6-month randomized controlled trial [Journal article]. <i>Obesity (Silver Spring, Md.)</i> , 31 Suppl 1(Suppl 1), 85-95. <a href="https://doi.org/10.1002/oby.23577">https://doi.org/10.1002/oby.23577</a>                                                        | Duplicated              |
| 42 | Papageorgiou, M., Biver, E., Mareschal, J., Phillips, N. E., Hemmer, A., Biolley, E., Schwab, N., Manoogian, E. N. C., Rodriguez, E. G., Aeberli, D., Hans, D., Pot, C., Panda, S., Rodondi, N., Ferrari, S. L., & Collet, T. H. (2023). The effects of time-restricted eating and weight loss on bone metabolism and                                                                                                                                                                                                                 | Duplicated              |

|    |                                                                                                                                                                                                                                                                                                                                                                                                                                                                                                                                                        |                              |
|----|--------------------------------------------------------------------------------------------------------------------------------------------------------------------------------------------------------------------------------------------------------------------------------------------------------------------------------------------------------------------------------------------------------------------------------------------------------------------------------------------------------------------------------------------------------|------------------------------|
|    | health: a 6-month randomized controlled trial. OBESITY, 31, 85-95. <a href="https://doi.org/10.1002/oby.23577">https://doi.org/10.1002/oby.23577</a>                                                                                                                                                                                                                                                                                                                                                                                                   |                              |
| 43 | Parr, E., Kouw, I., Wheeler, M., Radford, B., Hall, R., Senden, J., Goessens, J., Van Loon, L., & Hawley, J. (2022). Short-term time-restricted eating does not lower muscle protein synthesis rates in men with overweight/obesity [Journal article; Conference proceeding]. Obesity reviews, 23. <a href="https://doi.org/10.1111/obr.13502">https://doi.org/10.1111/obr.13502</a>                                                                                                                                                                   | Study design                 |
| 44 | Phillips, N. E., Mareschal, J., Schwab, N., Manoogian, E. N. C., Borloz, S., Ostinelli, G., Gauthier-Jaques, A., Umwali, S., Gonzalez Rodriguez, E., Aeberli, D., Hans, D., Panda, S., Rodondi, N., Naef, F., & Collet, T. H. (2021). The Effects of Time-Restricted Eating versus Standard Dietary Advice on Weight, Metabolic Health and the Consumption of Processed Food: A Pragmatic Randomised Controlled Trial in Community-Based Adults. Nutrients, 13(3). <a href="https://doi.org/10.3390/nu13031042">https://doi.org/10.3390/nu13031042</a> | Non-outcome of interest      |
| 45 | Pureza, I., Melo, I. S. V., Macena, M. L., Praxedes, D. R. S., Vasconcelos, L. G. L., Silva-Júnior, A. E., Florêncio, T., & Bueno, N. B. (2020). Acute effects of time-restricted feeding in low-income women with obesity placed on hypoenergetic diets: Randomized trial. Nutrition, 77, 110796. <a href="https://doi.org/10.1016/j.nut.2020.110796">https://doi.org/10.1016/j.nut.2020.110796</a>                                                                                                                                                   | Non-intervention of interest |
| 46 | Steger, F. L., Jamshed, H., Bryan, D. R., Richman, J. S., Warriner, A. H., Hanick, C. J., Martin, C. K., Salvy, S. J., & Peterson, C. M. (2023). Early time-restricted eating affects weight, metabolic health, mood, and sleep in adherent completers: A secondary analysis. Obesity (Silver Spring), 31 Suppl 1(Suppl 1), 96-107. <a href="https://doi.org/10.1002/oby.23614">https://doi.org/10.1002/oby.23614</a>                                                                                                                                  | Duplicated                   |
| 47 | Steger, F. L., Jamshed, H., Martin, C. K., Richman, J. S., Bryan, D. R., Hanick, C. J., Salvy, S. J., Warriner, A. H., & Peterson, C. M. (2023). Impact of early time-restricted eating on diet quality, meal frequency, appetite, and eating behaviors: A randomized trial. Obesity (Silver Spring), 31 Suppl 1(Suppl 1), 127-138. <a href="https://doi.org/10.1002/oby.23642">https://doi.org/10.1002/oby.23642</a>                                                                                                                                  | Non-outcome of interest      |
| 48 | Stratton, M. T., Tinsley, G. M., Alesi, M. G., Hester, G. M., Olmos, A. A., Serafini, P. R., Modjeski, A. S., Mangine, G. T., King, K., Savage, S. N., & et al. (2020). Four weeks of time-restricted feeding combined with resistance training does not differentially influence measures of body composition, muscle performance, resting energy expenditure, and blood biomarkers [Journal article]. Nutrients, 12(4). <a href="https://doi.org/10.3390/nu12041126">https://doi.org/10.3390/nu12041126</a>                                          | Study design                 |

|    |                                                                                                                                                                                                                                                                                                                                                                                                                                                                                                                                |                         |
|----|--------------------------------------------------------------------------------------------------------------------------------------------------------------------------------------------------------------------------------------------------------------------------------------------------------------------------------------------------------------------------------------------------------------------------------------------------------------------------------------------------------------------------------|-------------------------|
| 49 | Stratton, M. T., Tinsley, G. M., Alesi, M. G., Hester, G. M., Olmos, A. A., Serafini, P. R., Modjeski, A. S., Mangine, G. T., King, K., Savage, S. N., Webb, A. T., & VanDusseldorp, T. A. (2020). Four Weeks of Time-Restricted Feeding Combined with Resistance Training Does Not Differentially Influence Measures of Body Composition, Muscle Performance, Resting Energy Expenditure, and Blood Biomarkers. <i>Nutrients</i> , 12(4). <a href="https://doi.org/10.3390/nu12041126">https://doi.org/10.3390/nu12041126</a> | Duplicated              |
| 50 | Sutton, E. F., Beyl, R., Early, K. S., Cefalu, W. T., Ravussin, E., & Peterson, C. M. (2018). Early Time-Restricted Feeding Improves Insulin Sensitivity, Blood Pressure, and Oxidative Stress Even without Weight Loss in Men with Prediabetes. <i>Cell Metab</i> , 27(6), 1212-1221.e1213. <a href="https://doi.org/10.1016/j.cmet.2018.04.010">https://doi.org/10.1016/j.cmet.2018.04.010</a>                                                                                                                               | Non-outcome of interest |
| 51 | Teong, X. T., Liu, K., Vincent, A. D., Bensalem, J., Liu, B., Hattersley, K. J., Zhao, L., Feinle-Bisset, C., Sargeant, T. J., Wittert, G. A., Hutchison, A. T., & Heilbronn, L. K. (2023). Intermittent fasting plus early time-restricted eating versus calorie restriction and standard care in adults at risk of type 2 diabetes: a randomized controlled trial. <i>Nat Med</i> , 29(4), 963-972. <a href="https://doi.org/10.1038/s41591-023-02287-7">https://doi.org/10.1038/s41591-023-02287-7</a>                      | Non-outcome of interest |
| 52 | Thomas, E. A., Zaman, A., Sloggett, K. J., Steinke, S., Grau, L., Catenacci, V. A., Cornier, M. A., & Rynders, C. A. (2022). Early time-restricted eating compared with daily caloric restriction: A randomized trial in adults with obesity. <i>Obesity (Silver Spring)</i> , 30(5), 1027-1038. <a href="https://doi.org/10.1002/oby.23420">https://doi.org/10.1002/oby.23420</a>                                                                                                                                             | Non-outcome of interest |
| 53 | Tinsley, G. M., Forsse, J. S., Butler, N. K., Paoli, A., Bane, A. A., La Bounty, P. M., Morgan, G. B., & Grandjean, P. W. (2017). Time-restricted feeding in young men performing resistance training: A randomized controlled trial. <i>Eur J Sport Sci</i> , 17(2), 200-207. <a href="https://doi.org/10.1080/17461391.2016.1223173">https://doi.org/10.1080/17461391.2016.1223173</a>                                                                                                                                       | Non-outcome of interest |
| 54 | Tinsley, G. M., Moore, M. L., Graybeal, A. J., Paoli, A., Kim, Y., Gonzales, J. U., Harry, J. R., VanDusseldorp, T. A., Kennedy, D. N., & Cruz, M. R. (2019). Time-restricted feeding plus resistance training in active females: a randomized trial. <i>Am J Clin Nutr</i> , 110(3), 628-640. <a href="https://doi.org/10.1093/ajcn/nqz126">https://doi.org/10.1093/ajcn/nqz126</a>                                                                                                                                           | Non-outcome of interest |
| 55 | Tinsley, G. M., & Paoli, A. (2019). Time-restricted eating and age-related muscle loss. <i>Aging (Albany NY)</i> , 11(20), 8741-8742. <a href="https://doi.org/10.18632/aging.102384">https://doi.org/10.18632/aging.102384</a>                                                                                                                                                                                                                                                                                                | Study design            |

|    |                                                                                                                                                                                                                                                                                                                                                                                                                                                  |                         |
|----|--------------------------------------------------------------------------------------------------------------------------------------------------------------------------------------------------------------------------------------------------------------------------------------------------------------------------------------------------------------------------------------------------------------------------------------------------|-------------------------|
| 56 | Tovar, A. P., Richardson, C. E., Keim, N. L., Van Loan, M. D., Davis, B. A., & Casazza, G. A. (2021). Four Weeks of 16/8 Time Restrictive Feeding in Endurance Trained Male Runners Decreases Fat Mass, without Affecting Exercise Performance. <i>Nutrients</i> , 13(9). <a href="https://doi.org/10.3390/nu13092941">https://doi.org/10.3390/nu13092941</a>                                                                                    | Non-outcome of interest |
| 57 | Valenzuela, P. L., Castillo-García, A., & Lucia, A. (2022). Calorie Restriction with or without Time-Restricted Eating in Weight Loss. <i>N Engl J Med</i> , 387(3), 280-281. <a href="https://doi.org/10.1056/NEJMc2207023">https://doi.org/10.1056/NEJMc2207023</a>                                                                                                                                                                            | Study design            |
| 58 | Vidmar, A. P., Naguib, M., Raymond, J. K., Salvy, S. J., Hegedus, E., Wee, C. P., & Goran, M. I. (2021). Time-Limited Eating and Continuous Glucose Monitoring in Adolescents with Obesity: A Pilot Study. <i>Nutrients</i> , 13(11). <a href="https://doi.org/10.3390/nu13113697">https://doi.org/10.3390/nu13113697</a>                                                                                                                        | Non-outcome of interest |
| 59 | Wei, X., Lin, B., Huang, Y., Yang, S., Huang, C., Shi, L., Liu, D., Zhang, P., Lin, J., Xu, B., Guo, D., Li, C., He, H., Liu, S., Xue, Y., Xu, Y., & Zhang, H. (2023). Effects of Time-Restricted Eating on Nonalcoholic Fatty Liver Disease: The TREATY-FLD Randomized Clinical Trial. <i>JAMA Netw Open</i> , 6(3), e233513. <a href="https://doi.org/10.1001/jamanetworkopen.2023.3513">https://doi.org/10.1001/jamanetworkopen.2023.3513</a> | Non-outcome of interest |
| 60 | Xie, Z., Sun, Y., Ye, Y., Hu, D., Zhang, H., He, Z., Zhao, H., Yang, H., & Mao, Y. (2022). Randomized controlled trial for time-restricted eating in healthy volunteers without obesity. <i>Nat Commun</i> , 13(1), 1003. <a href="https://doi.org/10.1038/s41467-022-28662-5">https://doi.org/10.1038/s41467-022-28662-5</a>                                                                                                                    | Non-outcome of interest |
| 61 | Zeb, F., Wu, X., Chen, L., Fatima, S., Ijaz Ul, H., Chen, A., Xu, C., Jianglei, R., Feng, Q., & Li, M. (2020). Time-restricted feeding is associated with changes in human gut microbiota related to nutrient intake. <i>Nutrition</i> , 78, 110797. <a href="https://doi.org/10.1016/j.nut.2020.110797">https://doi.org/10.1016/j.nut.2020.110797</a>                                                                                           | Non-outcome of interest |

**Table S3.** Effects of time-restricted eating interventions on bone mineral content compared to control conditions.

| Study                           | Population              | TRE   | CON     | n TRE/CON | Length<br>wk | Mean (SE) <sup>1</sup>  |                         |
|---------------------------------|-------------------------|-------|---------|-----------|--------------|-------------------------|-------------------------|
|                                 |                         |       |         |           |              | TRE pre/post            | CON pre/post            |
| Kotarsky et al.<br>(2021) [42]  | Ov-Ob                   | 16:8  | Non-TRE | 11/10     | 8            | 2600 (110) / 2580 (110) | 2580 (130) / 2570 (120) |
| Lobene et al.<br>(2021) [44]    | Ov-Ob                   | 16:8  | Non-TRE | 11/9      | 12           | 2852 (173) / 2866 (162) | 2801 (159) / 2784 (159) |
| Lowe et al.<br>(2023) [47]      | Ov-Ob                   | 16:8  | Non-TRE | 24/22     | 12           | 2511 (78) / 2523 (78)   | 2542 (78) / 2547 (78)   |
| Papageorgiou et al. (2023) [45] | ≥1 component<br>of MetS | 12:12 | Non-TRE | 23/19     | 24           | 2595 (97) / 2591 (94)   | 2548 (118) / 2543 (108) |

<sup>1</sup> Pre-post means (standard errors) of total body bone mineral content (g) in TRE and non-TRE groups.

**Abbreviations:** CON, control group; **MetS**, metabolic syndrome; **Ob**, obesity; **Ov**, overweight; **SE**, standard error; **TRE**, time-restricted eating; **wk**, weeks.



**Table S4.** Effects of time-restricted eating interventions on bone turnover markers compared to control conditions.

| Study                           | Bone turnover marker | Measure | Mean (SE) <sup>1</sup>  |                         |
|---------------------------------|----------------------|---------|-------------------------|-------------------------|
|                                 |                      |         | TRE <sub>pre/post</sub> | CON <sub>pre/post</sub> |
| Papageorgiou et al. (2023) [45] | CTX                  | ng/L    | 397 (26) / 388 (31)     | 407 (33) / 431.3 (44)   |
| Lobene et al. (2021) [44]       | PINP                 | ng/mL   | 18.7 (1.3) / 18.5 (1.5) | 28.8 (8.8) / 24.7 (8.2) |
| Papageorgiou et al. (2023) [45] |                      | ug/L    | 54.4 (4.7) / 51.4 (4.3) | 51.4 (2.9) / 48.5 (4.0) |
| Lobene et al. (2021) [44]       | NTX                  | pg/mL   | 1074 (112) / 1102 (104) | 1780 (513) / 1722 (327) |

<sup>1</sup> Pre-post means (standard errors) of bone turnover markers in TRE and non-TRE groups.

**Abbreviations:** CON, control group; CTX, C-terminal telopeptide of type I collagen; NTX, N-terminal telopeptide of type I collagen; PINP, N-terminal propeptide of type I procollagen; SE, standard error; TRE, time-restricted eating; wk, weeks.

**Table S5.** Effects of time-restricted eating interventions on bone mineral density compared to control conditions.

| Study                           | Population                | TRE   | CON          | n TRE/CON | Length <sub>wk</sub> | MD (SD) <sup>1</sup> |                |
|---------------------------------|---------------------------|-------|--------------|-----------|----------------------|----------------------|----------------|
|                                 |                           |       |              |           |                      | TRE                  | CON            |
| Kotarsky et al. (2021) [42]     | Ov-Ob                     | 16:8  | Non-TRE      | 11/10     | 8                    | -0.010 (0.060)       | 0.010 (0.016)  |
| Liu et al. (2023) [43]          | Ob                        | 16:8  | Non-TRE      | 19/19     | 8                    | 0.000 (0.087)        | 0.010 (0.087)  |
| Liu et al. (2023b) [43]         | Ob                        | 16:8  | Non-TRE + Ex | 19/20     | 8                    | 0.000 (0.087)        | 0.010 (0.089)  |
| Lobene et al. (2021) [44]       | Ov-Ob                     | 16:8  | Non-TRE      | 11/9      | 12                   | 0.002 (0.033)        | 0.001 (0.150)  |
| Papageorgiou et al. (2023) [45] | ≥1 component of MetS      | 12:12 | Non-TRE      | 18/15     | 24                   | 0.000 (0.063)        | 0.010 (0.027)  |
| Richardson et al. (2023) [46]   | Endurance-trained runners | 16:8  | Non-TRE      | 15/15     | 4                    | 0.001 (0.046)        | -0.001 (0.046) |

<sup>1</sup> Pre-post mean differences (standard deviations) of total body bone mineral density (g/cm<sup>2</sup>) in TRE and non-TRE groups.

**Abbreviations:** CON, control group; Ex, exercise; MD, mean difference; MetS, metabolic syndrome; Ob, obesity; Ov, overweight; SD, standard deviation; TRE, time-restricted eating; wk, weeks.

**Table S6.** Effects of time-restricted eating interventions on fat mass compared to control conditions.

| Study                                        | Population                | TRE  | CON          | n TRE/CON | Length <sub>wk</sub> | MD (SD) <sup>1</sup> |             | MD (95% CI)                  |
|----------------------------------------------|---------------------------|------|--------------|-----------|----------------------|----------------------|-------------|------------------------------|
|                                              |                           |      |              |           |                      | TRE                  | CON         |                              |
| Kotarsky et al. (2021) [42]                  | Ov-Ob                     | 16:8 | Non-TRE      | 11/10     | 8                    | -3.0 (9.4)           | -1.0 (8.9)  | -2.0 (-9.8 to 5.8)           |
| Liu et al. (2023) [43]                       | Ob                        | 16:8 | Non-TRE      | 19/19     | 8                    | -0.3 (40.3)          | 0.4 (59.6)  | -0.6 (-33.0 to 31.7)         |
| Liu et al. (2023b) [43]                      | Ob                        | 16:8 | Non-TRE + Ex | 19/20     | 8                    | -0.2 (38.2)          | 0.3 (41.5)  | -0.5 (-25.5 to 24.5)         |
| Lobene et al. (2021) [44]                    | Ov-Ob                     | 16:8 | Non-TRE      | 11/9      | 12                   | -1.7 (23.5)          | -0.9 (29.3) | -0.8 (-24.5 to 22.9)         |
| Lowe et al. (2023) [47]                      | Ov-Ob                     | 16:8 | Non-TRE      | 24/22     | 12                   | -0.5 (1.6)           | -0.03 (1.5) | -0.5 (-1.4 to 0.4)           |
| Richardson et al. (2023) [46]                | Endurance-trained runners | 16:8 | Non-TRE      | 15/15     | 4                    | -0.8 (1.3)           | 0.1 (4.3)   | -0.9 (-3.2 to 1.4)           |
| <b>Random effects model <math>I^2</math></b> |                           |      |              |           |                      |                      |             |                              |
| <b>= 0%</b>                                  |                           | -    | 16:8         | Non-TRE   | 99/95                | 4 to 12              | -           | <b>-0.56 (-1.40 to 0.29)</b> |

<sup>1</sup> Pre-post mean differences (standard deviations) of fat mass (kg) in TRE and non-TRE groups.

**Abbreviations:** CON, control group; Ex, exercise; MetS, metabolic syndrome; Ob, obesity; Ov, overweight; SE, standard error; TRE, time-restricted eating; wk, weeks.

**Table S7.** Effects of time-restricted eating interventions on lean mass compared to control conditions.

| Study                                                 | Population | TRE  | CON          | n TRE/CON | Length <sub>wk</sub> | MD (SD) <sup>1</sup> |             | MD (95% CI)                  |
|-------------------------------------------------------|------------|------|--------------|-----------|----------------------|----------------------|-------------|------------------------------|
|                                                       |            |      |              |           |                      | TRE                  | CON         |                              |
| Kotarsky et al. (2021) [42]                           | Ov-Ob      | 16:8 | Non-TRE      | 11/10     | 8                    | 0.0 (9.4)            | 1.0 (8.9)   | -1.0 (-8.8 to 6.8)           |
| Liu et al. (2023) [43]                                | Ob         | 16:8 | Non-TRE      | 19/19     | 8                    | -2.8 (39.0)          | -1.1 (36.1) | -1.6 (-25.5 to 22.2)         |
| Liu et al. (2023b) [43]                               | Ob         | 16:8 | Non-TRE + Ex | 19/20     | 8                    | -2.3 (35.8)          | -2.3 (43.6) | -0.1 (-25.0 to 24.9)         |
| Lobene et al. (2021) [44]                             | Ov-Ob      | 16:8 | Non-TRE      | 11/9      | 12                   | -1.4 (13.9)          | -0.1 (11.7) | -1.3 (-12.5 to 9.9)          |
| Lowe et al. (2023) [47]                               | Ov-Ob      | 16:8 | Non-TRE      | 24/22     | 12                   | -1.1 (1.6)           | -0.4 (1.4)  | -0.7 (-1.6 to 0.1)           |
| <b>Random effects model <math>I^2</math><br/>= 0%</b> | Ov-Ob      | 16:8 | Non-TRE      | 84/84     | 8 to 12              | -                    | -           | <b>-0.76 (-1.61 to 0.10)</b> |

<sup>1</sup>Pre-post mean differences (standard deviations) of lean mass (kg) in TRE and non-TRE groups.

**Abbreviations:** CON, control group; Ex, exercise; MetS, metabolic syndrome; Ob, obesity; Ov, overweight; SE, standard error; TRE, time-restricted eating; wk, weeks.

**Table S8.** Sensitivity analyses using the leave-one-out method.

| Reference                       | MD <sup>1</sup> | LL     | UL    | <i>p</i> | <i>I</i> <sup>2</sup> (%) |
|---------------------------------|-----------------|--------|-------|----------|---------------------------|
| All studies                     | -0.009          | -0.026 | 0.009 | 0.328    | 0                         |
| <b><i>Omitting:</i></b>         |                 |        |       |          |                           |
| Kotarsky et al. (2021) [42]     | -0.005          | -0.025 | 0.014 | 0.587    | 0                         |
| Liu et al. (2023) [43]          | -0.008          | -0.027 | 0.010 | 0.361    | 0                         |
| Liu et al. (2023b) [43]         | -0.008          | -0.027 | 0.010 | 0.361    | 0                         |
| Lobene et al. (2021) [44]       | -0.009          | -0.026 | 0.009 | 0.319    | 0                         |
| Papageorgiou et al. (2023) [45] | -0.008          | -0.028 | 0.012 | 0.441    | 0                         |
| Richardson et al. (2023) [46]   | -0.013          | -0.033 | 0.008 | 0.223    | 0                         |

<sup>1</sup> Mean difference in bone mineral density (g/cm<sup>2</sup>) after comparing TRE and non-TRE groups.

**Abbreviations:** **LL**, lower limit; **MD**, mean difference; **UL**, upper limit.

**Table S9.** Sensitivity analysis after maintaining the predominant health status and time-restricted eating protocol among the included studies.

| <b>Sensitivity analysis</b> | <b>Data</b> | <b>n</b> | <b>MD (95% CI) <sup>1</sup></b> | <b>p</b> | <b>I<sup>2</sup> (%)</b> |
|-----------------------------|-------------|----------|---------------------------------|----------|--------------------------|
| Predominant health status   | Ov-Ob       | 5        | -0.013 (-0.033 to 0.008)        | 0.223    | 0                        |
| Predominant TRE protocol    | 16:8        | 5        | -0.008 (-0.028 to 0.012)        | 0.441    | 0                        |

<sup>1</sup> Mean difference in bone mineral density (g/cm<sup>2</sup>) after comparing TRE and non-TRE groups.

**n** represents the number of comparisons included in each sensitivity analysis.

**Abbreviations:** **CI**, confidence interval; **MD**, mean difference; **Ob**, obesity; **Ov**, Overweight; **TRE**, time-restricted eating.

**Table S10.** Quality of evidence assessment according to the GRADE approach.

| Certainty assessment       |                 |                                                           |                                       |                          |                      |                     | № of patients |         | Effect<br>(95% CI)            | Certainty                                                                        | Importance<br>of the<br>outcome |
|----------------------------|-----------------|-----------------------------------------------------------|---------------------------------------|--------------------------|----------------------|---------------------|---------------|---------|-------------------------------|----------------------------------------------------------------------------------|---------------------------------|
| Outcome                    | № of<br>studies | Risk of bias                                              | Heterogeneity<br>and<br>inconsistency | Indirectness             | Imprecision          | Publication<br>bias | Intervention  | Control |                               |                                                                                  |                                 |
| Bone<br>mineral<br>density | 6               | Serious.<br>All studies<br>rated as<br>"some<br>concerns" | Not serious.<br>$I^2 = 0.0\%$         | Not serious <sup>a</sup> | Serious <sup>b</sup> | Not available       | 93            | 88      | -0.009 (-<br>0.026,<br>0.009) | ⊕⊕○○<br>Low<br>(downgrade by 2<br>levels for risk of<br>bias and<br>imprecision) | Important                       |

Abbreviations: CI: confidence interval.

<sup>a</sup> Population, intervention, and outcomes did not differ across studies.

<sup>b</sup> The confidence interval of the effect size contained a null value.

**Figure S1.** Risk of bias assessment.

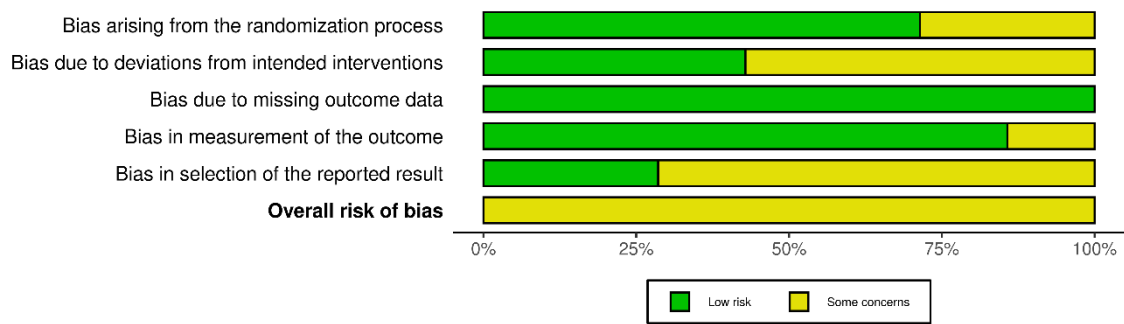

|          |                                            | Risk of bias domains                                                                                                                                                                                                                            |    |    |    |    |
|----------|--------------------------------------------|-------------------------------------------------------------------------------------------------------------------------------------------------------------------------------------------------------------------------------------------------|----|----|----|----|
|          |                                            | D1                                                                                                                                                                                                                                              | D2 | D3 | D4 | D5 |
| Study    | Kotarsky et al. (2021) <sup>[42]</sup>     | +                                                                                                                                                                                                                                               | -  | +  | +  | -  |
|          | Liu et al. (2023) <sup>[43]</sup>          | +                                                                                                                                                                                                                                               | -  | +  | +  | +  |
|          | Lobene et al. (2021) <sup>[44]</sup>       | +                                                                                                                                                                                                                                               | -  | +  | +  | -  |
|          | Lowe et al. (2020) <sup>[47]</sup>         | +                                                                                                                                                                                                                                               | -  | +  | -  | +  |
|          | Martens et al. (2020) <sup>[50]</sup>      | -                                                                                                                                                                                                                                               | +  | +  | +  | -  |
|          | Papageorgiou et al. (2023) <sup>[45]</sup> | +                                                                                                                                                                                                                                               | +  | +  | +  | -  |
|          | Richardson et al. (2023) <sup>[46]</sup>   | -                                                                                                                                                                                                                                               | +  | +  | +  | -  |
| Domains: |                                            | D1: Bias arising from the randomization process.<br>D2: Bias due to deviations from intended intervention.<br>D3: Bias due to missing outcome data.<br>D4: Bias in measurement of the outcome.<br>D5: Bias in selection of the reported result. |    |    |    |    |
|          |                                            | Judgement<br>- Some concerns<br>+ Low                                                                                                                                                                                                           |    |    |    |    |
